# Supplementary material for: Targeted Hydrolysis of β-Lactam Antibiotics in Dry Suspension Residue: A Proposed Method to Reduce Ecological Toxicity and Bacterial Resistance
Source: MDPI journal article supplement (doi:10.3390/w13162225), 2021-08-16
Supplement: s1 [file s1]

Archive with 1 entries (1 files):
- water-1274240-supplementary.pdf
